# Supplementary material
Source: PubMed Central journal article supplement (PMC2569975)
Supplement: NIHMS62115-supplement-si20070206_103.pdf [file NIHMS62115-supplement-si20070206_103.pdf]

## Uniformly Aligned Full-length Membrane Proteins in Lipid Crystalline Bilayers for Structural Characterization

Conggang Li,<sup>†</sup> Philip Gao,<sup>‡</sup> Huajun Qin<sup>†</sup>, Rose Chase<sup>†</sup>, Timothy A. Cross<sup>\*,†,‡,§</sup>

*Department of Chemistry and Biochemistry, Florida State University, Tallahassee, Florida, 32306. Institute of Molecular Biophysics, Florida State University, Tallahassee, Florida, 32306, and National High Magnetic Field Laboratory, Tallahassee, Florida 32310.*

### Sample preparation for Solid-state NMR

*Preparation of lipid stocks.* 1,2-Dimyristol-*sn*-Glycero-3-Phosphocholine (DMPC) and 1,2-Dimyristoyl-*sn*-Glycero-3-[Phospho-*rac*-(1-glycerol)] (Sodium Salt) (DMPG) were dissolved in chloroform at a molar ratio of 4:1 in a round-bottom flask and the solvent evaporated in a rotary evaporator followed by vacuum drying overnight. The DMPC/DMPG film was then dissolved in deionized water at a final concentration 20mg/ml, bath sonicated followed by three freeze (liquid-nitrogen)-thaw (37°C) cycle for 3 times.

*Reconstitution.* The preformed liposomes were added to the purified protein solution in DPC to a final ratio of 10:1 (w:w – lipid to protein dry weight ratio), 20% octyl-glucoside (OG) is then added to the protein liposomes mixtures until the solution clarifies, usually the final OG concentration is about 50 to 100mM. After overnight incubation at 37°C, OG was removed by dialysis.

*Aligned sample preparation.* Proteoliposomes were pelleted by ultracentrifugation from the dialyzed solution (196000g, 90min) in a 70 Ti rotor. The 50 mg pellet was suspended in 1 mL of HPLC-grade water. Aliquots were spread on 33 glass slides (12×5.7×0.07 mm) dehydrated in a 78% relative humidity chamber at room temperature for a day. The slides were stacked into a sample cell followed by incubation at 97% relative humidity in a small chamber for one week at 37 °C to achieve a hydration level of approximately 50%. The sample cell was sealed with wax for solid-state NMR experiments.

### Oligomeric state of Rv1861

28 mg of Rv1861 per L of minimal media culture are typically achieved in the form of inclusion bodies. Purification via a reconstitution protocol<sup>1</sup> has resulted in high purity samples on SDS PAGE gels. On PFO gels a large oligomeric structure is implicated, potentially an octamer (Figure S1).

## Rv1861 Standards

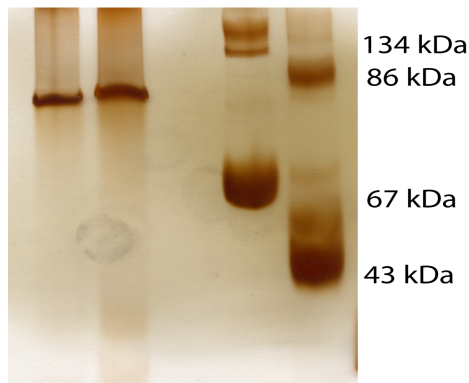

Figure S1: PFO- gel of Rv1861 showing that the molecular weight is approximately 80 kDa suggesting an octamer.

### PISA wheel as a function of CSA:

Chemical shift tensor anisotropy (CSA) variation will blur the resonance pattern in the PISEMA spectrum that forms the PISA wheel. Figure S2 shows the PISA wheel at 2 tilt angles with a distribution of 20 ppm for each of the tensor elements. When the tilt angle is small,  $\sigma_{11}$  and  $\sigma_{22}$  have little effect on the shape of the wheel while  $\sigma_{33}$  shifts the position of the wheel. However, when the tilt angle is large,  $\sigma_{11}$  and  $\sigma_{22}$  have a significant influence on the shape of the wheel, while  $\sigma_{33}$  has little effect.

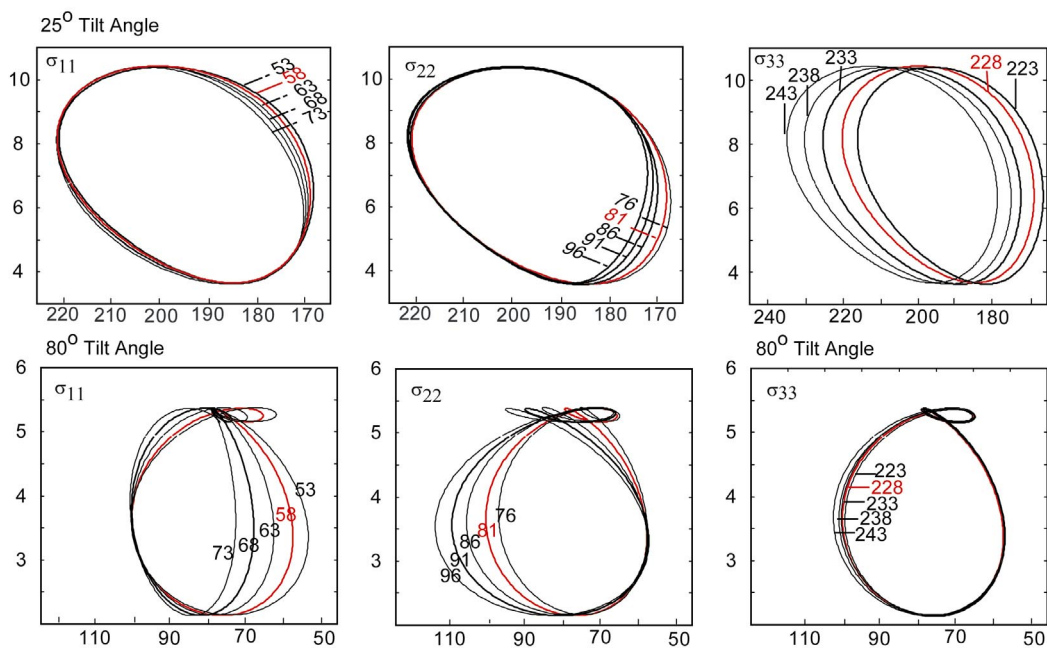

Figure S2: PISA wheel as a function of CSA tensor variation.

Reference:

(1) Page, R. C.; Moore, J. D.; Nguyen, H. B.; Sharma, M.; Chase, R.; Gao, F. P.; Mobley, C. K.; Sanders, C. R.; Ma, L.; Sonnichsen, F. D.; Lee, S.; Howell, S. C.; Opella, S. J.; Cross, T. A. *J Struct Funct Genomics* **2006**, 7, 51-64.
